# Supplementary material
Source: Springer Nature journal article supplement (https://www.springermedizin.de/resource/supplementary/12916_2009_210_MOESM10_ESM.pdf/9599400)
Supplement: MOESM10 [file 9599400]

Review: Clinical pathway and total hip and knee arthroplasty  
 Comparison: 05 Care Pathway vs standard care  
 Outcome: 06 Hospitalisation cost

| Study or sub-category | N          | Care pathway<br>Mean (SD) | N          | Standard care<br>Mean (SD) | WMD (random)<br>95% CI | Weight<br>%   | WMD (random)<br>95% CI      |
|-----------------------|------------|---------------------------|------------|----------------------------|------------------------|---------------|-----------------------------|
| Wammack L (H)         | 31         | 5.27 (1.16)               | 24         | 10.90 (4.28)               |                        | 4.73          | -5.63 [-7.39, -3.87]        |
| Mabrey JD             | 24         | 4.07 (1.63)               | 11         | 5.86 (1.71)                |                        | 7.68          | -1.79 [-2.99, -0.59]        |
| Macario H             | 63         | 6.91 (2.51)               | 120        | 10.14 (3.21)               |                        | 10.60         | -3.23 [-4.07, -2.39]        |
| Macario K             | 107        | 7.74 (1.38)               | 144        | 12.22 (3.36)               |                        | 12.92         | -4.48 [-5.09, -3.87]        |
| Ireson                | 64         | 6.47 (1.25)               | 64         | 6.91 (1.58)                |                        | 14.04         | -0.44 [-0.93, 0.05]         |
| Brunenberg (k)        | 30         | 0.28 (0.37)               | 32         | 0.60 (0.18)                |                        | 16.57         | -0.32 [-0.47, -0.17]        |
| Brunenberg (h)        | 48         | 0.34 (0.47)               | 50         | 0.52 (0.13)                |                        | 16.60         | -0.18 [-0.32, -0.04]        |
| Lin YK                | 69         | 0.76 (0.03)               | 53         | 1.16 (0.04)                |                        | 16.86         | -0.40 [-0.41, -0.39]        |
| <b>Total (95% CI)</b> | <b>436</b> |                           | <b>498</b> |                            |                        | <b>100.00</b> | <b>-1.54 [-1.99, -1.09]</b> |

Test for heterogeneity:  $\text{Chi}^2 = 266.14$ ,  $\text{df} = 7$  ( $P < 0.00001$ ),  $I^2 = 97.4\%$   
 Test for overall effect:  $Z = 6.67$  ( $P < 0.00001$ )

-10 -5 0 5 10  
 Favours treatment Favours control
